# Supplementary material for: Dependence between cytotoxicity and dynamic subcellular localization of up-conversion nanoparticles with different surface charges
Source: Royal Society of Chemistry journal article supplement (doi:10.1039/c7ra04487a), 2017-01-01
Supplement: c7ra04487a1.pdf [file c7ra04487a1.pdf]

# Supporting Information

## Dependence between Cytotoxicity and Dynamic Subcellular Localization of Upconversion Nanoparticles with Different Surface Charges

Xiaodan Li<sup>a,b</sup>, Ying Tang<sup>a</sup>, Lijun Xu<sup>a\*</sup>, Li Zhang<sup>a</sup>, Yulei Chang<sup>b</sup>, Xianggui Kong<sup>b</sup>, Huiying Zhao<sup>a\*</sup>,  
Hong Zhang<sup>b,c</sup> and Xiaomin Liu<sup>b\*</sup>

<sup>a</sup> Department of Respiratory Medicine, The First Hospital, Jilin University, Changchun 130021, China. E-mail: lijunxu001@sina.com

<sup>b</sup> State Key Laboratory of Luminescence and Applications, Changchun Institute of Optics, Fine Mechanics and Physics, Chinese Academy of Sciences, Changchun 130033, P. R. China. E-mail: xmliu@ciomp.ac.cn

<sup>c</sup> Van't Hoff Institute for Molecular Sciences, University of Amsterdam, Science Park 904, 1098 XH Amsterdam, The Netherlands. E-mail: h.zhang@uva.nl

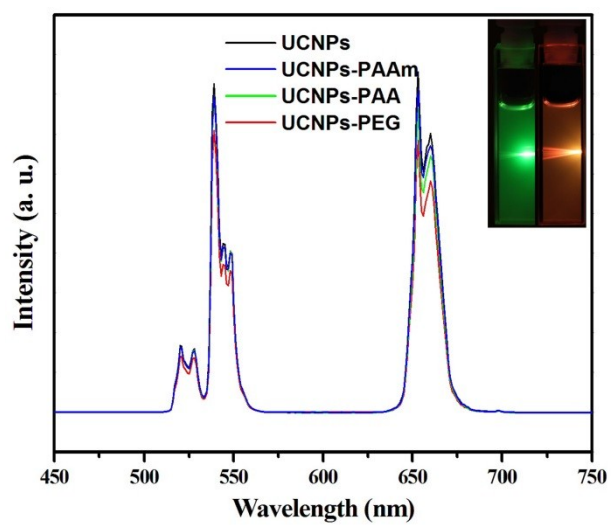

**Fig. S1** Spectra of upconversion luminescence of UCNPs modified with different polymers and the inserted pictures shows the digital photos of the sample under excitation of 980 nm.

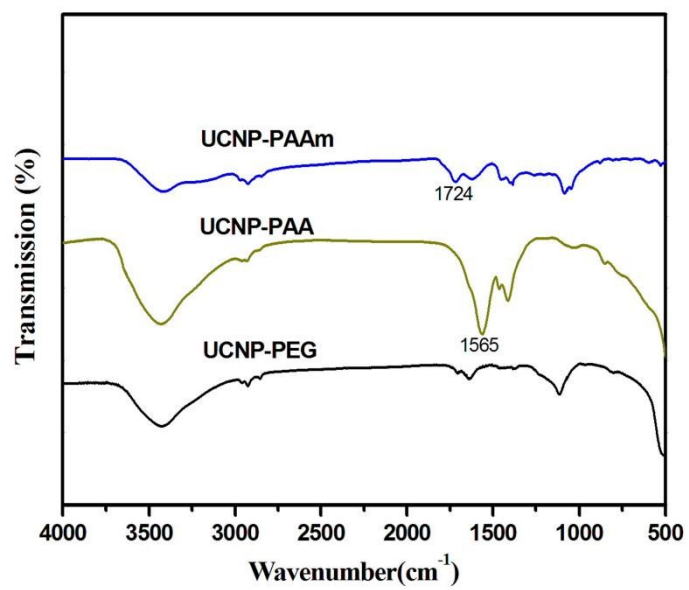

**Fig. S2** IR spectra of nanoparticles with different surface coating.

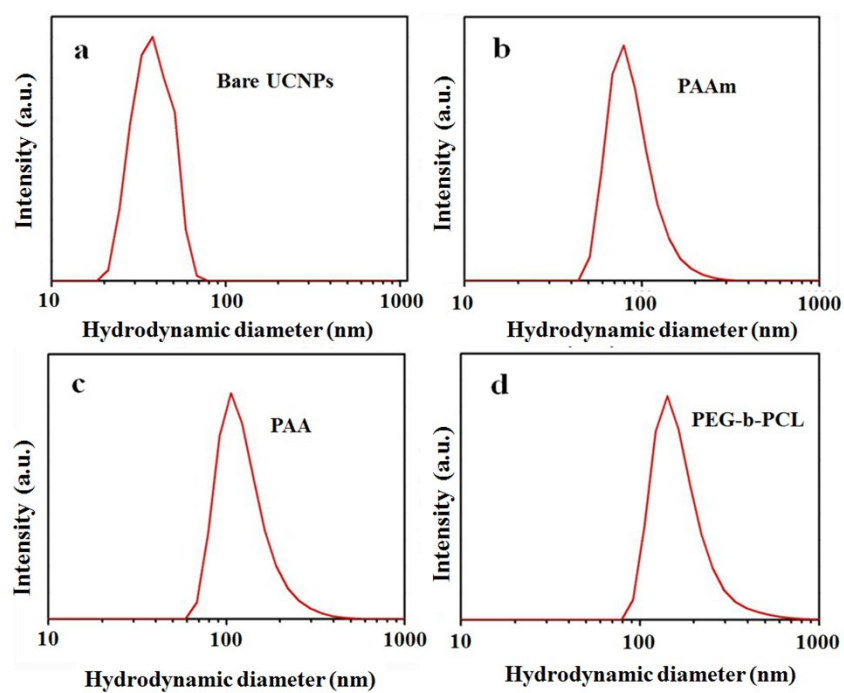

**Fig. S3** Hydrodynamic diameter distribution of NaYF<sub>4</sub>:Yb<sup>3+</sup>, Er<sup>3+</sup> UCNPs with different surface coatings (a. for bare UCNPs, b. for UCNPs modified with PAAm, c. for UCNPs modified with PAA, and d. for UCNPs modified with PEG-b-PCL).

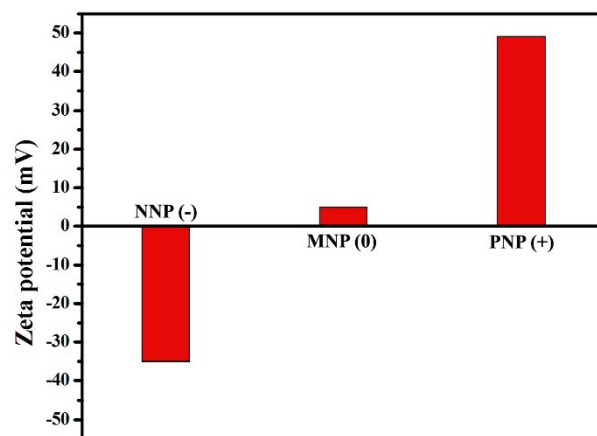

**Fig. S4** Zeta-potential of UCNPs with different surface charges (negative, neutral, and positive).

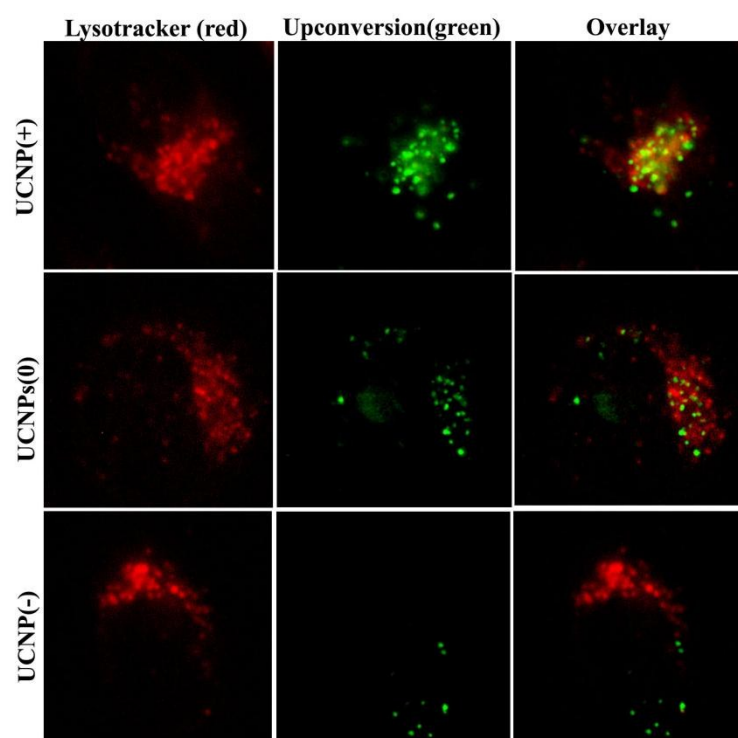

**Fig. S5** Polymer-coated UCNPs intracellular localization in A549 cells stained with lysotracker.

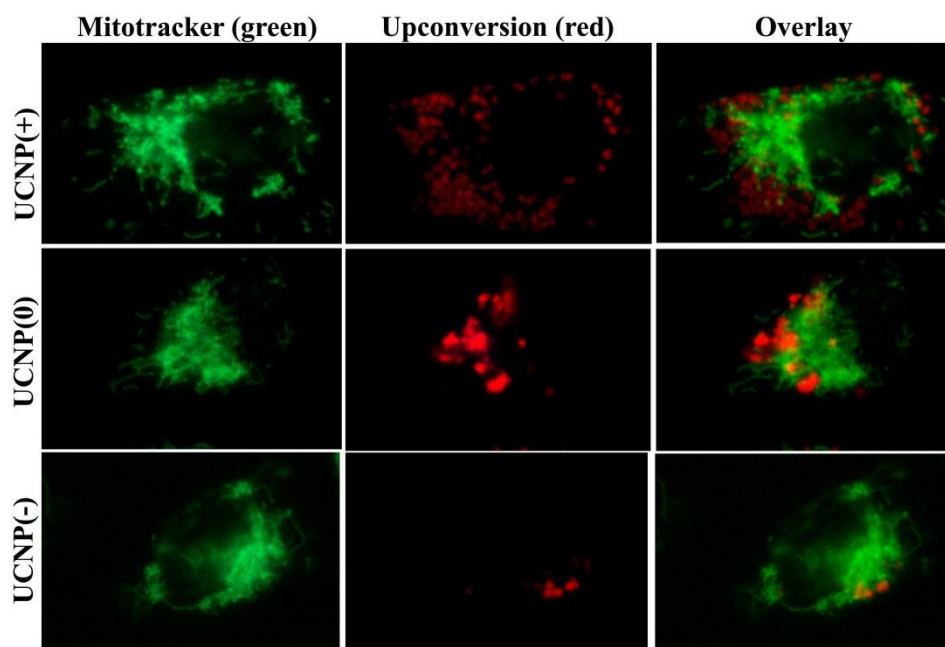

**Fig. S6** Polymer-coated UCNP's intracellular localization in A549 cells stained with Mitotracker.

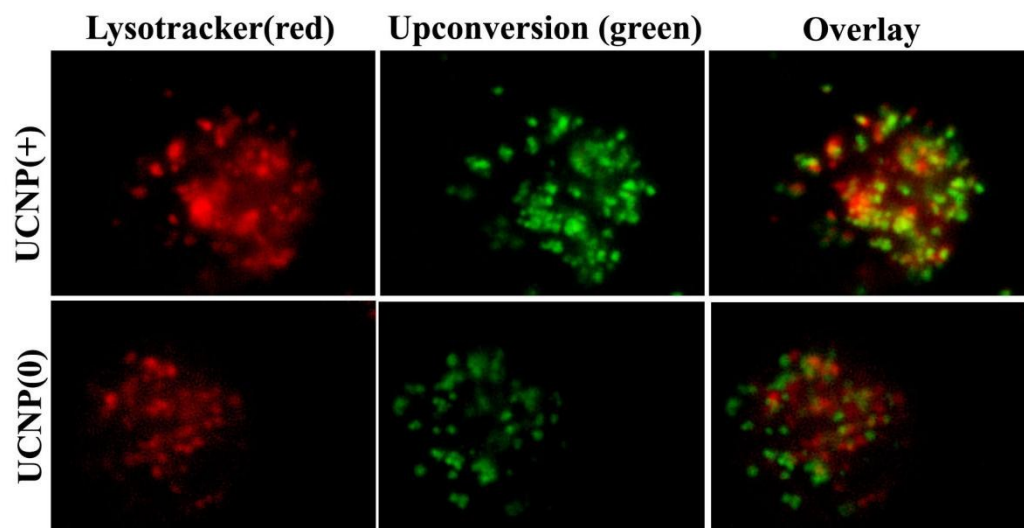

**Fig. S7** Polymer-coated UCNPs intracellular localization in BV-2 cells stained with lysotracker.



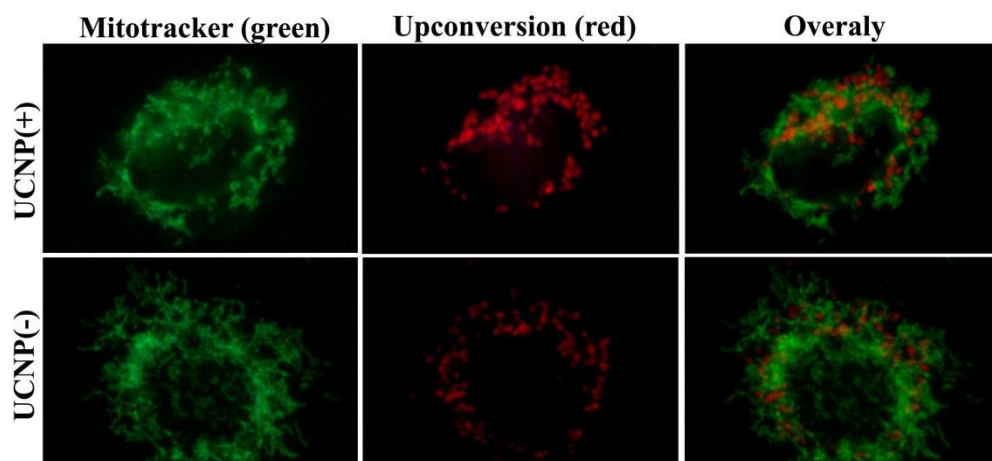

**Fig. S8** Polymer-coated UCNPs intracellular localization in BV-2 cells stained with Mitotracker.

| Cell line | BV-2 | HUVEC | A549 | QBC939 |
|-----------|------|-------|------|--------|
| UCNPs(+)  | 21.5 | 20.6  | 28.5 | 35.8   |
| UCNPs(0)  | 15.8 | 14.5  | 18.5 | 16.9   |
| UCNPs(-)  | <1   | <1    | 1.8  | 7.6    |

**Table S1.** The ICP analysis of  $Y^{3+}$  concentrations [% mg-1] in studied cell lines treated with different charged UCNPs.
